# Supplementary material for: ASH1L histone methyltransferase regulates the handoff between damage recognition factors in global-genome nucleotide excision repair
Source: PubMed Central journal article supplement (PMC5673894; doi:10.1038/s41467-017-01080-8), 2017-11-06
Supplement: 41467_2017_1080_MOESM1_ESM.pdf [file 41467_2017_1080_MOESM1_ESM.pdf]

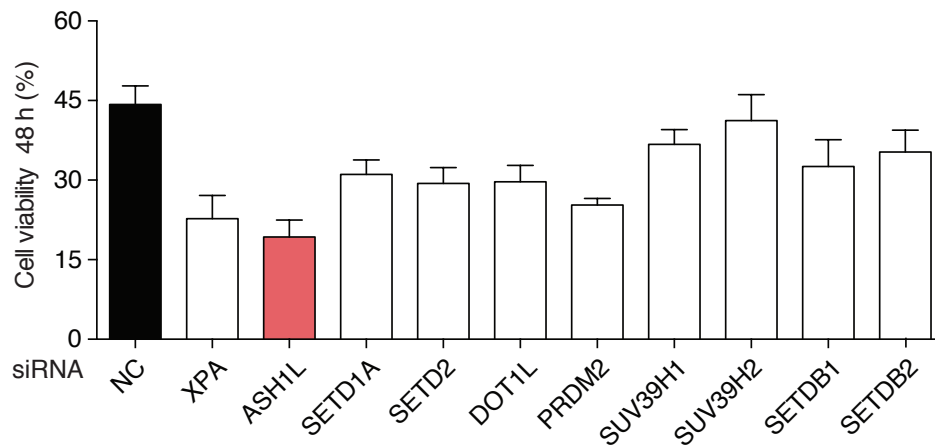

**Supplementary Figure 1. Effect of histone methyltransferase depletion on UV sensitivity**

HeLa cells were transfected with siRNA targeting the following transcripts: XPA, ASH1L, SETD1A, SETD2, DOT1L, PRDM2, SUV39H1, SUV39H2, SETDB1 and SETDB2. Control cells were transfected with non-coding RNA (NC). After an incubation of 48 h, cells were irradiated with UV-C ( $5 \text{ J m}^{-2}$ ) and their survival was assessed by the Alamar Blue assay following another 48 h. All values are expressed as the percentage of cell viability detected with corresponding unirradiated controls ( $n = 3$ , each independent experiment with 4 replicates).

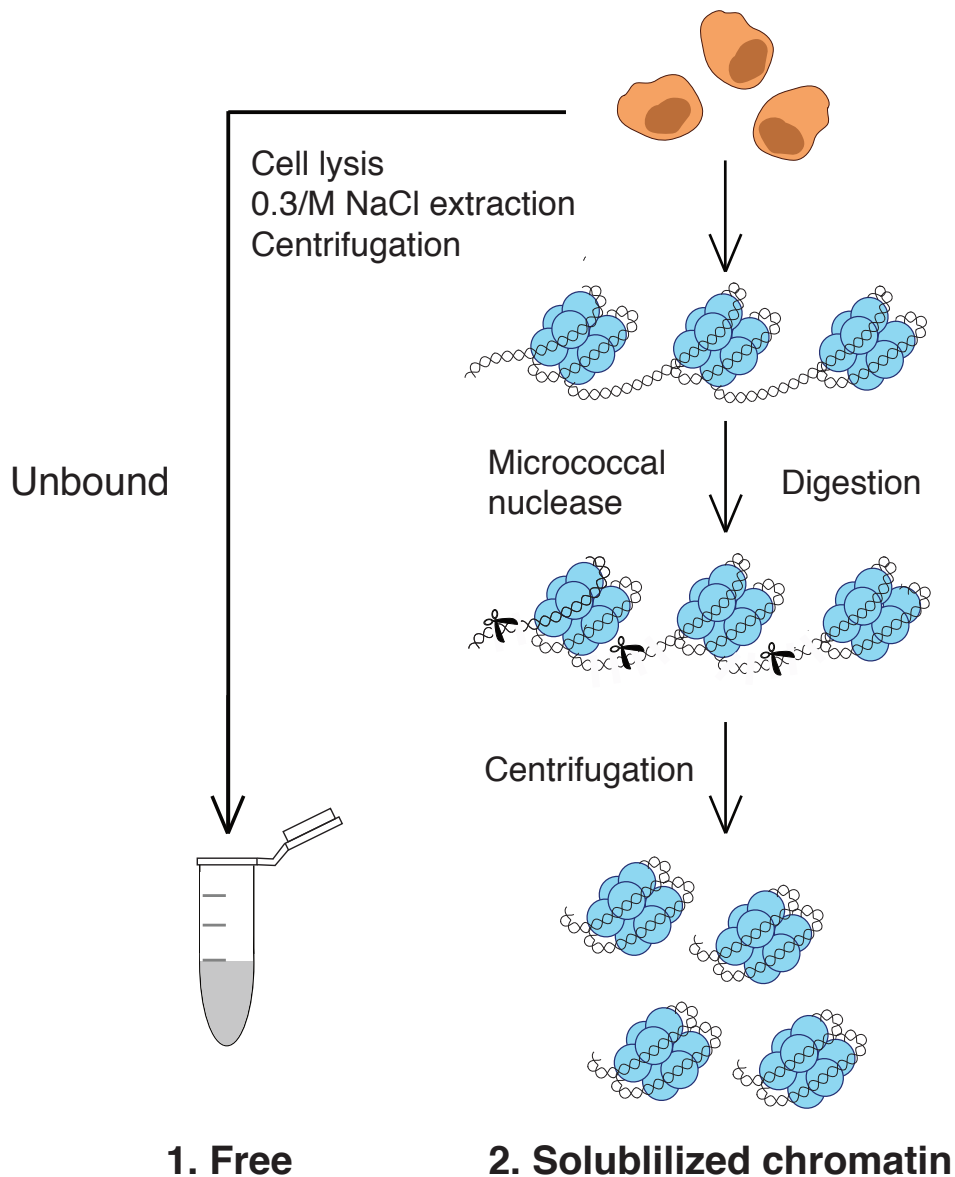

**Supplementary Figure 2. Solubilization of chromatin by nuclease digestion**

Flow diagram illustrating the chromatin analyses. HeLa cells were lysed and extracted with buffer containing 0.3 M NaCl to remove in the supernatant free proteins that are not associated with chromatin or only loosely bound to chromatin. The remaining chromatin pellet was solubilized by incubation with a saturating MNase concentration. By cleaving internucleosomal linker regions, this nuclease treatment generates solubilized chromatin containing mononucleosomes that are amenable to immunoprecipitation or other biochemical analyses. For chromatin immunoprecipitation (ChIP) assays, the cells were fixed by the addition of 1% (vol/vol) formaldehyde before extraction and solubilization.

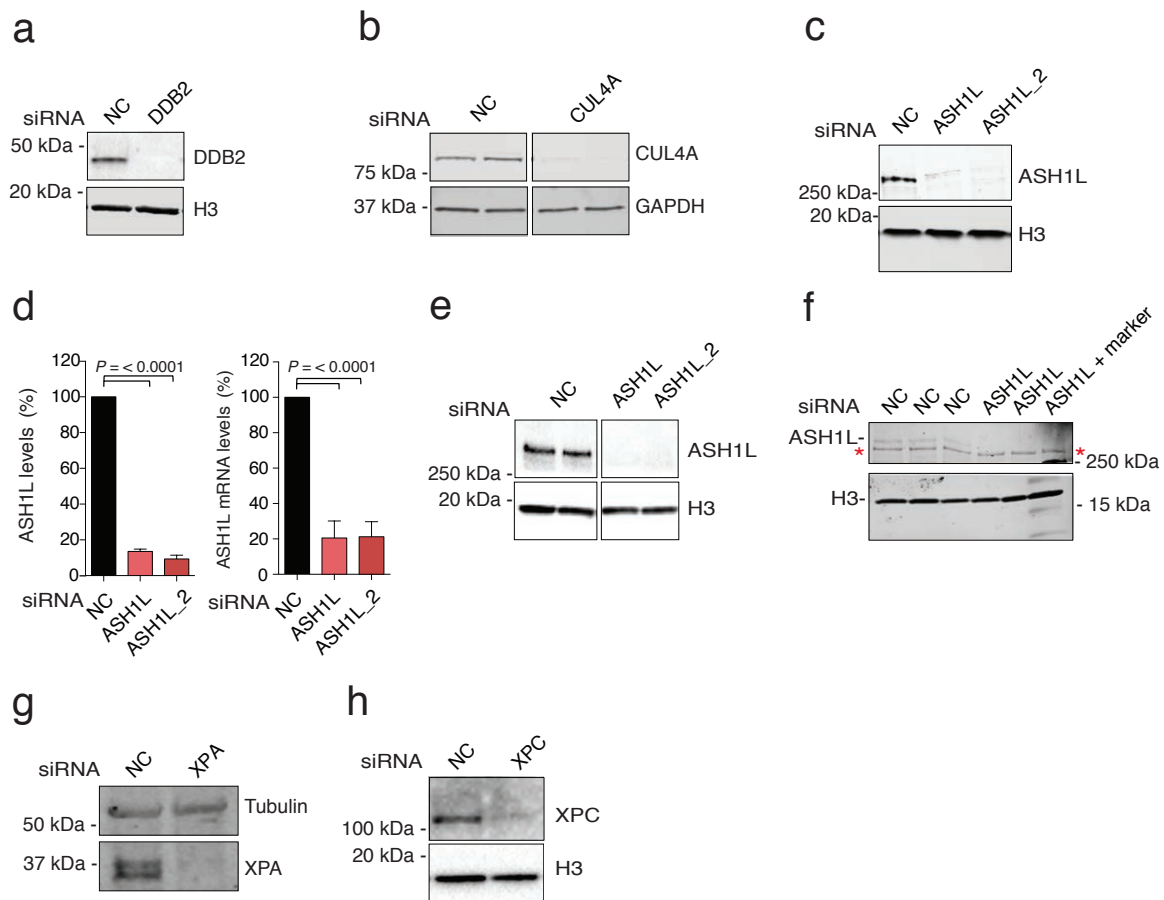

**Supplementary Figure 3. Efficiency of protein depletion 48 h after transfection with siRNA**

**(a)** Down regulation of DDB2 protein in HeLa cells. Immunoblot of whole-cell lysates with histone H3 as the loading control. siNC, non-coding control RNA.

**(b)** Down regulation of CUL4A in HeLa cells. Immunoblot of whole-cell lysates in duplicate with GAPDH as the loading control.

**(c)** ASH1L down regulation in HeLa cells using two different siRNA sequences. Immunoblot of whole-cell lysates with H3 as the loading control.

**(d)** The level of ASH1L protein and corresponding mRNA transcript was quantified over three independent experiments (error bars show s.e.m.).

**(e)** ASH1L down regulation in U2OS cells. Immunoblot of whole cell lysate with histone H3 as the loading control.

**(f)** Non-specific band, indicated by the asterisks, appearing when immunoblotting the chromatin fraction against ASH1L. The chromatin of HeLa cells transfected with siASH1L

(or non-coding siNC) was immunoblotted to demonstrate that only the upper of two closely migrating bands represents the ASH1L protein.

**(g)** XPA down regulation in HeLa cells, tubulin was used as the loading control.

**(h)** XPC down regulation in HeLa cells, H3 was used as the loading control.

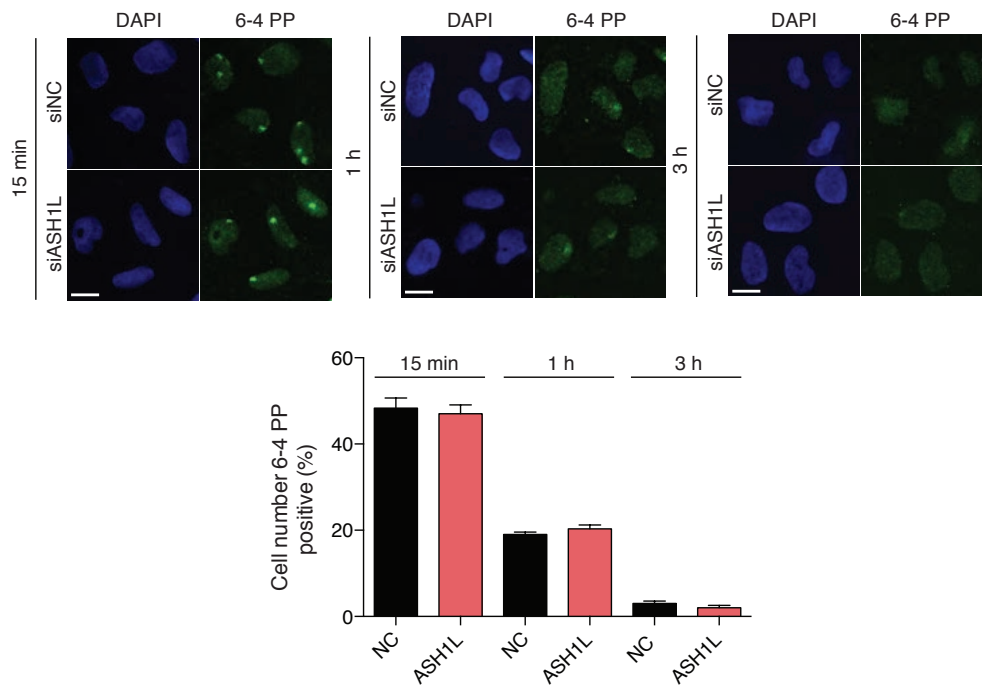

#### Supplementary Figure 4. Time course of 6-4PP repair in UV lesion spots

Immunofluorescence detection of 6-4PPs in U2OS at different times after UV radiation ( $100 \text{ J m}^{-2}$ ) through  $5\text{-}\mu\text{m}$  filter pores. DNA was stained with DAPI. This time course experiment shows that most 6-4PPs are removed from the UV lesion spots within 2-3 h after UV irradiation. Scale bar =  $15 \mu\text{m}$ .

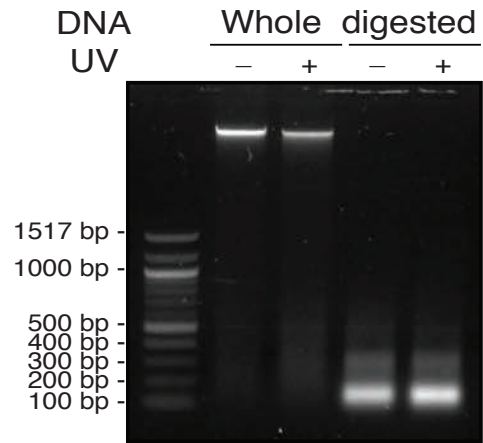

**Supplementary Figure 5. Mononucleosomes for immunoprecipitation studies**

Ethidium bromide staining of an agarose gel demonstrating the complete digestion of genomic DNA, to generate isolated nucleosome core particles, with a saturating MNase concentration. By this enzymatic digestion, the whole chromatin is converted to nucleosome core fragments of 147 base pairs.

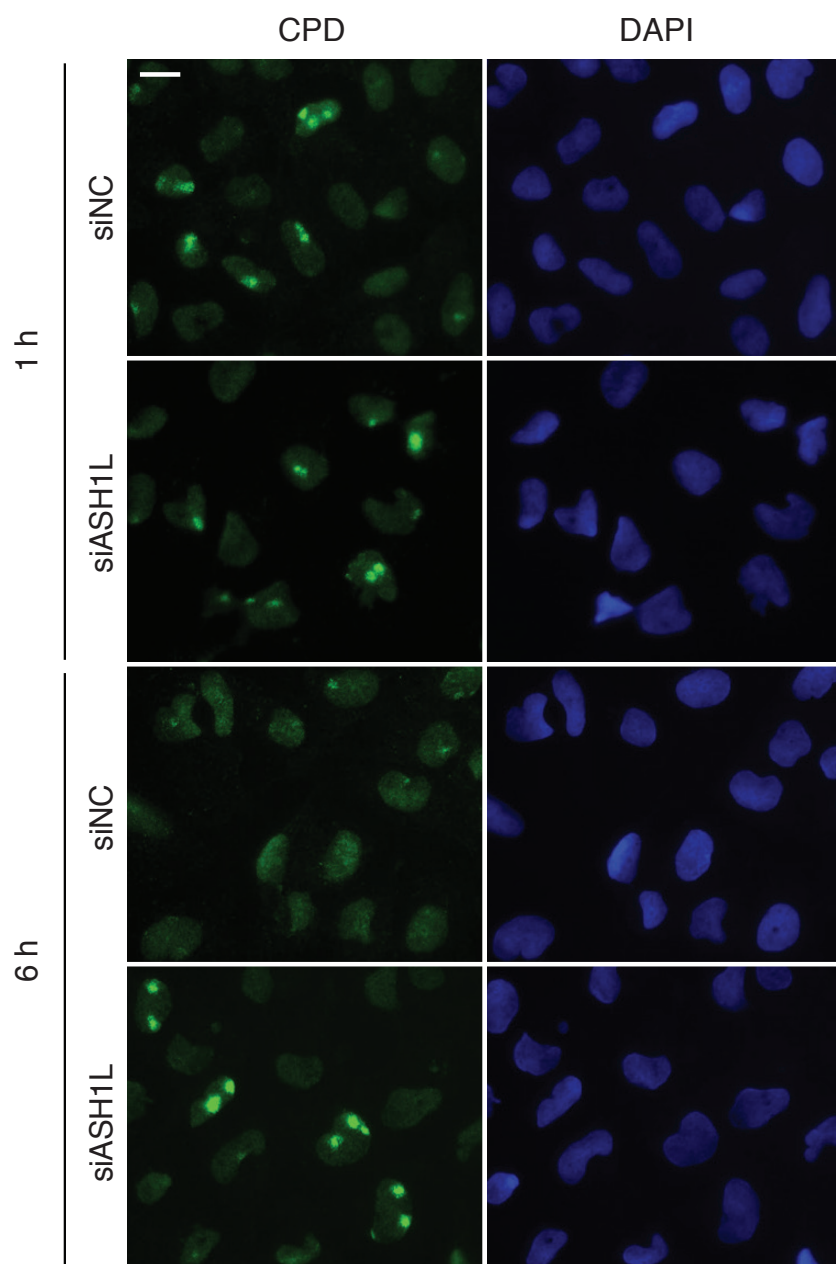

**Supplementary Figure 6. Wide-field views of immunofluorescence detection of CPDs**

U2OS cells were transfected with siASH1L or siNC 48 h before UV radiation ( $100 \text{ J m}^{-2}$ ) through  $5\text{-}\mu\text{m}$  filter pores. CPDs were stained with antibodies and DNA with DAPI. The figure shows representative images of cells after repair incubations of 1 and 6 h. At 6 h of repair, CPDs are barely detectable in control cells (transfected with siNC) but still appear as persistent bright spots in ASH1L-depleted cells. Scale bar =  $15 \mu\text{m}$ .

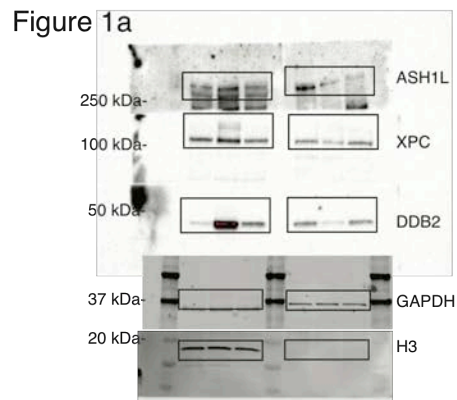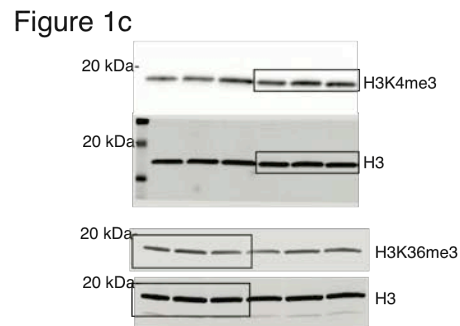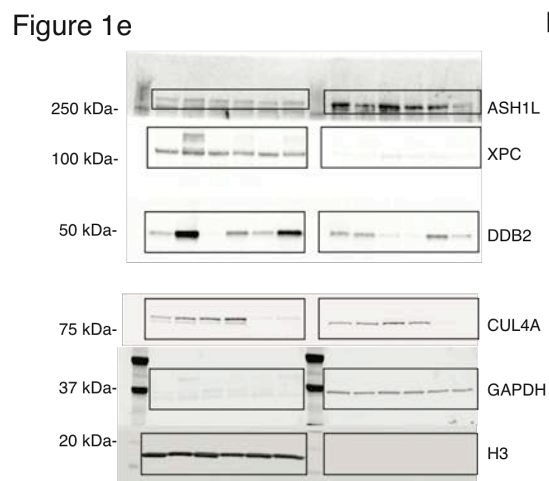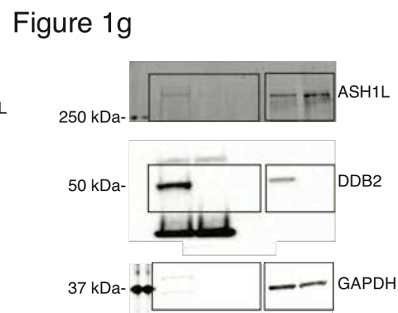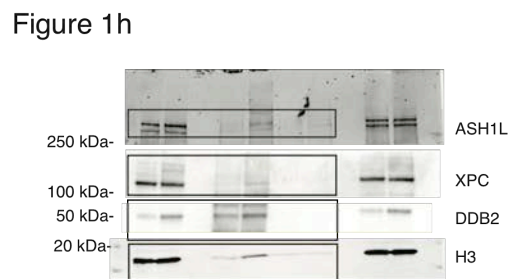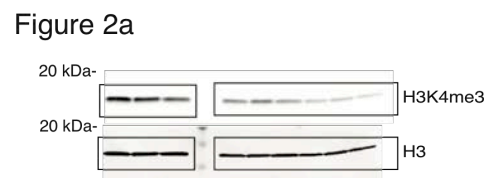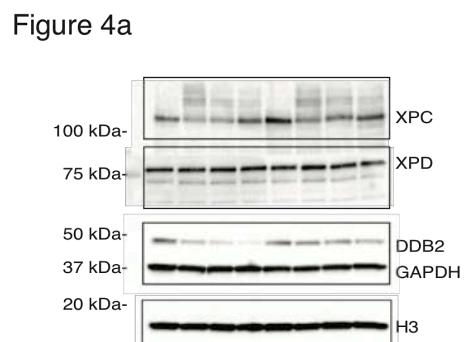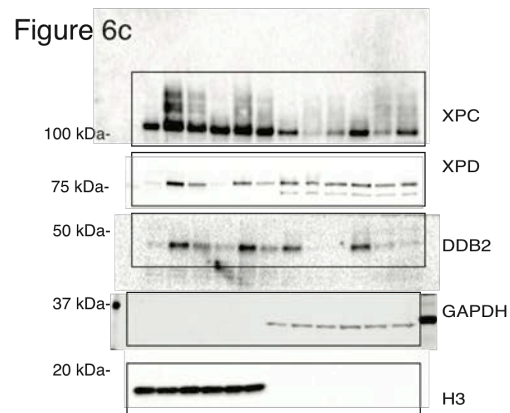

**Supplementary Figure 7. Full blots of Fig. 1, 2, 4 and 6 as indicated**  
Rectangles show the portion of each blot used for the respective figures.



Figure 7a

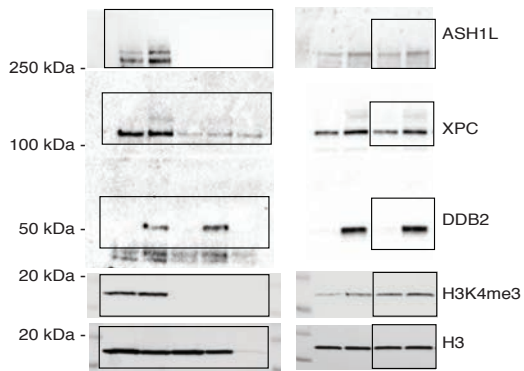

Figure 7c

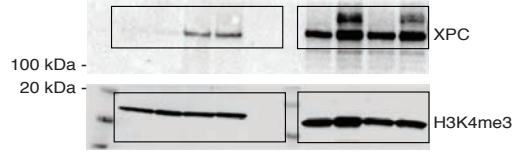

Figure 7e

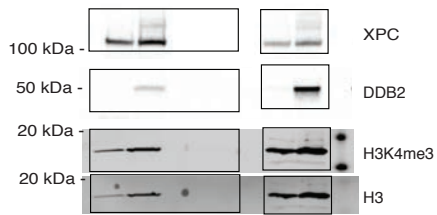

Figure 7f

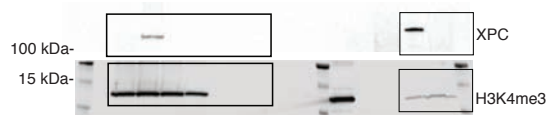

Figure 8b

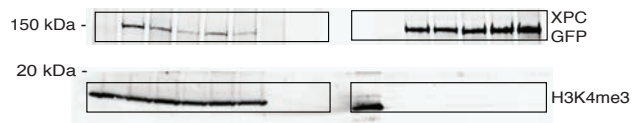

Figure 8e

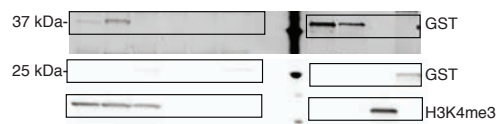

**Supplementary Figure 8. Full blots of Fig. 7 and Fig. 8 as indicated**

Rectangles show the portion of each blot used for the respective figures.

Supplementary Figure 3a

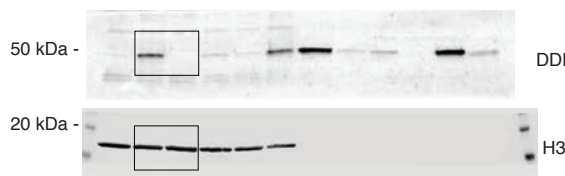

Supplementary Figure 3b

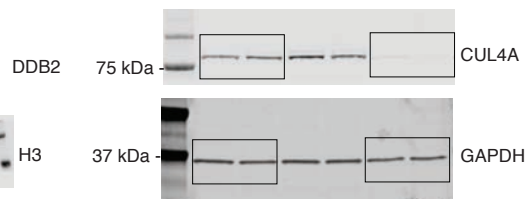

Supplementary Figure 3c

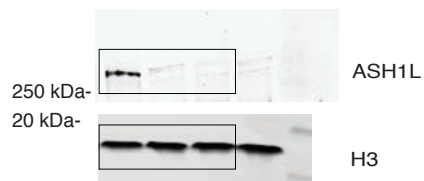

Supplementary Figure 3e

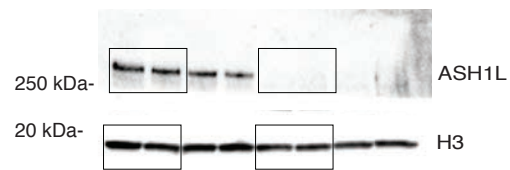

Supplementary Figure 3f

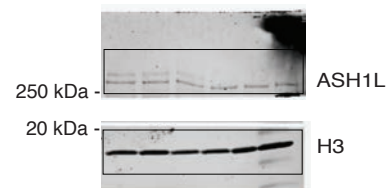

Supplementary Figure 3g

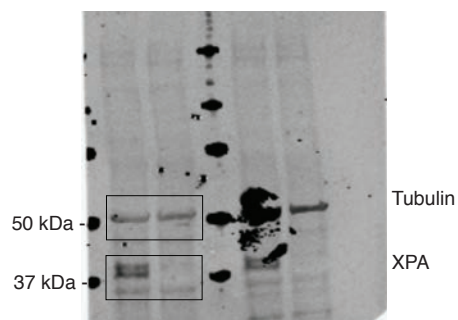

Supplementary Figure 3h

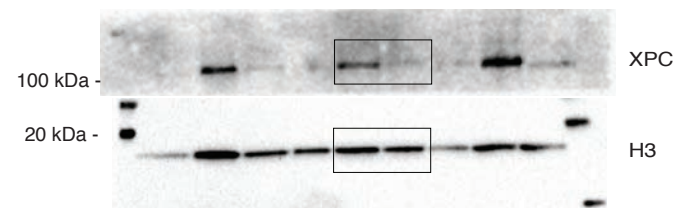

**Supplementary Figure 9. Full blots of Supplementary Fig. 3 as indicated**  
Rectangles show the portion of each blot used for the respective figures.

**Supplementary Table 1. Sequences of siRNA reagents**

| <b>siRNA</b>    | <b>Sequence</b>              | <b>Source, identifier</b> |
|-----------------|------------------------------|---------------------------|
| Non-coding (NC) | 5'-AAUUCUCCGAACGUGUCACGU-3'  | Qiagen, SI03650325        |
| DDB2            | 5'-GGAUCAAGCAGUUUUUGATT-3'   | Qiagen, SI02664823        |
| XPC             | 5'-GCAA AUGGCUUCUAUCGAATT-3' | Qiagen, SI00066227        |
| ASH1L           | 5'-TCGACTGTTATCTCACATTAA-3'  | Qiagen, SI00122094        |
| ASH1L_2         | 5'-CAGGCTGTCGTATCAATGCAA-3'  | Qiagen, SI00122087        |
| SETD2           | 5'-GAAACCGUCUCCAGUCUGUTT-3'  | Microsynth, 2463700       |
| PRDM2           | 5'-AACAGACCGGUUCAUAUAAATT-3' | Microsynth, 2055934       |
| CUL4A           | 5'- TTCGAAGGACATCATGGTTCA-3' | Microsynth, 2759182       |
| SETB1           | 5'-CAGCATGCGAATTCTGGGCAA-3'  | Qiagen, SI05062666        |
| SETB2           | 5'-TACCAGGTTTAGAATGGTATA-3'  | Qiagen, SI00141386        |
| SUV39H1         | 5'-CAGGTGTACAACGTCTTCATA-3'  | Qiagen, SI02665019        |
| SUV39H2         | 5'-AAGCGTTAAGCTGATAATGTA-3'  | Qiagen, SI02665026        |
| SETD1A          | 5'-CAGCGTATTATGAAAGCTGGA     | Qiagen, SI00453180        |
| DOT1L           | 5'-CCGGCCTTCGTCTGAAGCAGAA-3' | Qiagen, SI00143311        |
| XPA             | 5'-GCUACUGGAGGCAUGGCUATT-3'  | Microsynth, 2343554       |

**Supplementary Table 2. Sequences of quantitative RT-PCR primers**

| <b>Target</b> | <b>Sequence</b>           | <b>Source</b> |
|---------------|---------------------------|---------------|
| GAPDH         | fw-AGCCACATCGCTCAGACAC    | Microsynth    |
|               | rev-GCCCAATACGACCAAATCC   | Microsynth    |
| B2M           | fw-ATGTCTCGCTCCGTGGCCTTA  | Microsynth    |
|               | rev-ATCTTGGGCTGTGACAAAGTC | Microsynth    |
| ASH1L         | fw-TATTGAAGTGGCGGGCAG     | Microsynth    |
|               | rev-CACACAGTCACCCTGACGAA  | Microsynth    |

**Supplementary Table 3. List of antibodies**

| <b>Antibody</b>                                | <b>Source</b>     | <b>Catalog number</b> | <b>Dilutions</b>                 |
|------------------------------------------------|-------------------|-----------------------|----------------------------------|
| Mouse anti-DDB2                                | Abcam             | Cat#ab51017           | WB, 1:200; IF, 1:50; ChIP, 1:20  |
| Rabbit anti-H3K4me3                            | Abcam             | Cat#ab8580            | WB, 1:1,000; IF, 1:500; IP, 1:50 |
| Rabbit anti-H3k36me3                           | Abcam             | Cat#ab9050            | WB, 1:1,000                      |
| Rabbit anti-SETD2                              | Abcam             | Cat#ab31358           | WB, 1:500                        |
| Rabbit anti-GFP                                | Abcam             | Cat#ab290             | WB, 1:1,000                      |
| Mouse anti-XPC                                 | Abcam             | Cat#ab6264            | WB, 1:1,000                      |
| Mouse anti-GAPDH                               | Abcam             | Cat#ab9484            | WB, 1:1,000                      |
| Mouse anti-alfa-tubulin                        | SIGMA-ADRIK       | Cat#T5168             | WB, 1:1,000                      |
| Mouse anti-CPD                                 | Cosmo Bio Co LTD  | Cat#NMDND001          | IF, 1:1,000; ELISA 1:5,000       |
| Mouse anti-6-4PP                               | Cosmo Bio Co LTD  | Cat#NMDND002          | IF, 1:500; ELISA, 1:2,000        |
| Rabbit anti-ASH1L                              | Santa Cruz        | Cat#sc-98301          | WB, 1:1,000                      |
| Goat anti-H3                                   | Santa Cruz        | Cat#sc-8654           | WB, 1:1,000; IP, 1:20            |
| Rabbit anti-XPC                                | SIGMA-ADRIK       | Cat#X1129             | IF, 1:100; IP, 1:20              |
| Rabbit anti-GST                                | SIGMA-ADRIK       | Cat#G7781             | WB, 1:2,000                      |
| Rabbit anti-XPD                                | GeneTex           | Cat#GTX108948         | WB, 1:1,000; IF, 1:100           |
| Rabbit Anti-CLU4A                              | Thermo Scientific | Cat#PA5-17101         | WB, 1:1,000                      |
| Alexa Fluor 488 anti-rabbit                    | Thermo Scientific | Cat#A-32731           | IF, 1:400                        |
| Alexa Fluor 488 anti-mouse                     | Thermo Scientific | Cat#A-11001           | IF, 1:400                        |
| Alexa Fluor 594 anti-rabbit                    | Thermo Scientific | Cat#A-11037           | IF, 1:400                        |
| Alexa Fluor 594 anti-mouse                     | Thermo Scientific | Cat#A-11005           | IF, 1:400                        |
| F(ab') <sub>2</sub> secondary antibody, biotin | Thermo Scientific | Cat#31803             | ELISA, 1:2,000                   |
| Anti-Mouse IgG (Fab specific)                  | SIGMA-ADRIK       | Cat#A2304             | WB, 1:10,000                     |
| Anti-Rabbit IgG (whole molecule)               | SIGMA-ADRIK       | Cat#A0545             | WB, 1:10,000                     |
| IRDye 800CW goat anti-mouse IgG                | LI-COR            | Cat#925-32210         | WB, 1:10,000                     |
| IRDye 800CW goat anti-rabbit IgG               | LI-COR            | Cat#925-32211         | WB, 1:10,000                     |
| IRDye 800CW donkey anti-goat IgG               | LI-COR            | Cat#925-32214         | WB, 1:10,000                     |
| IRDye 680LT goat anti-mouse IgG                | LI-COR            | Cat#925-68020         | WB, 1:10,000                     |
| IRDye 680LT goat anti-rabbit IgG               | LI-COR            | Cat#925-68021         | WB, 1:10,000                     |

WB, Western blots; IF, immunofluorescence; ChIP, chromatin immunoprecipitation; IP, immunoprecipitation.
